# Supplementary material
Source: PubMed Central journal article supplement (PMC9253703)
Supplement: mmc1.pdf [file mmc1.pdf]

**Supplemental information**

**SARS-CoV-2 infects an *in vitro* model of the human  
developing pancreas through endocytosis**

**Wojciech J. Szlachcic, Agnieszka Dabrowska, Aleksandra Milewska, Natalia Ziojła, Katarzyna Blaszczyk, Emilia Barreto-Duran, Marek Sanak, Marcin Surmiak, Katarzyna Owczarek, Dariusz Grzanka, Julia Durzynska, Krzysztof Pyrc, and Malgorzata Borowiak**

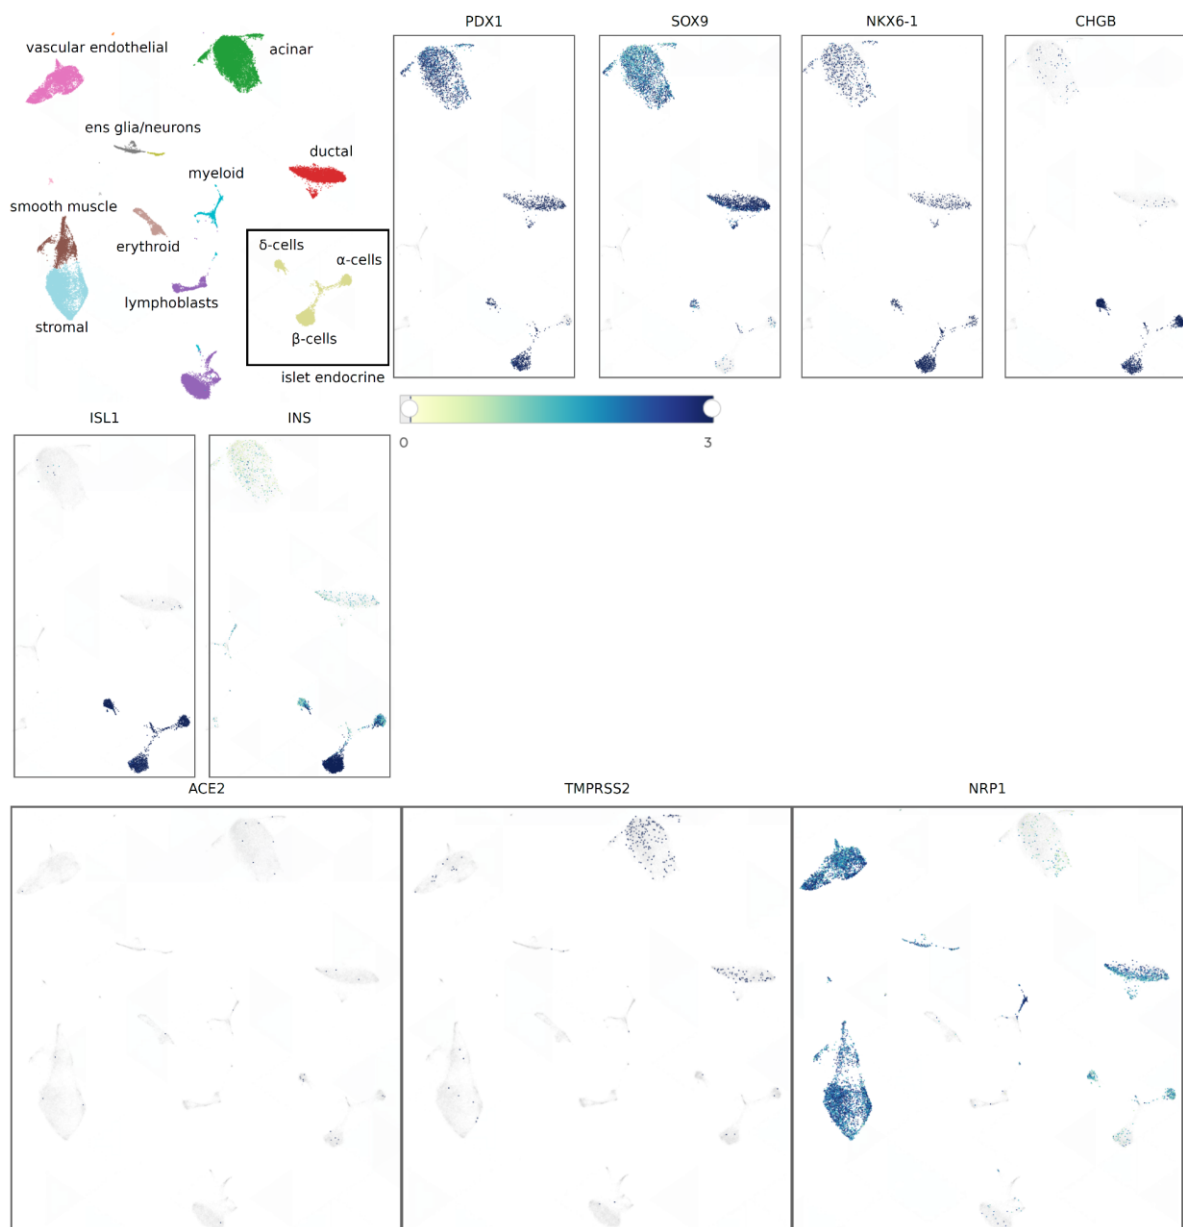

**Figure S1. Transcripts encoding SARS-CoV-2 receptors are expressed in developing human pancreas, Related to Figure 1.** Single cell RNA-sequencing analysis of pancreatic markers and SARS-CoV-2 receptors (ACE2, TMPRSS2, NRP1) expression in human fetal pancreas at 16-17 weeks of estimated post conceptual age (Cao et al., 2020; extracted from: <https://descartes.brotmanbaty.org/bbi/human-gene-expression-during-development/dataset/pancreas>)

a.

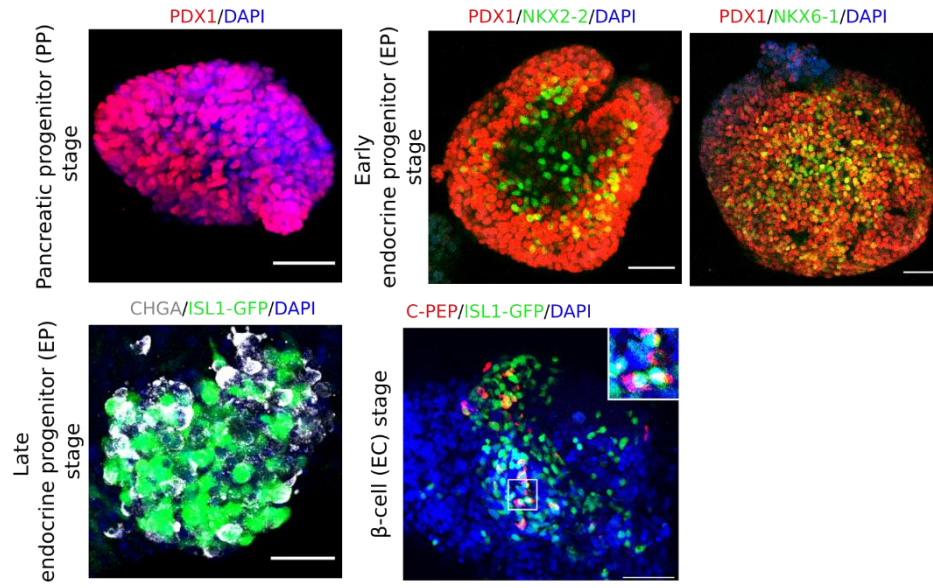

b.

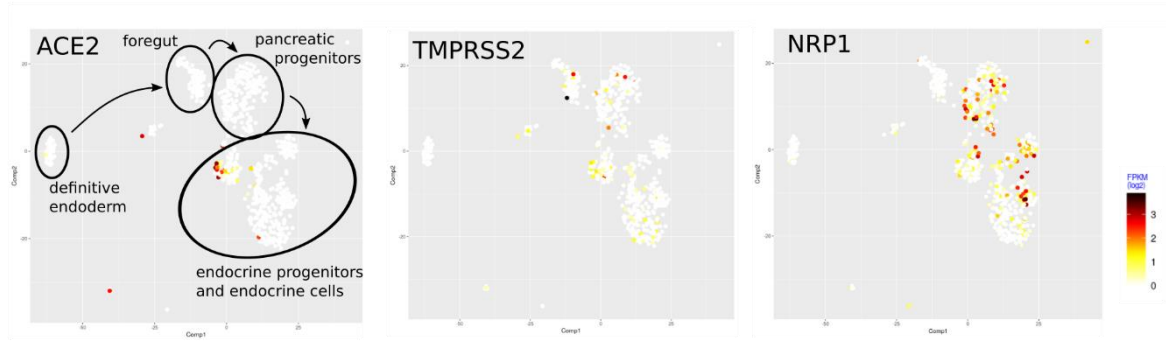

c.

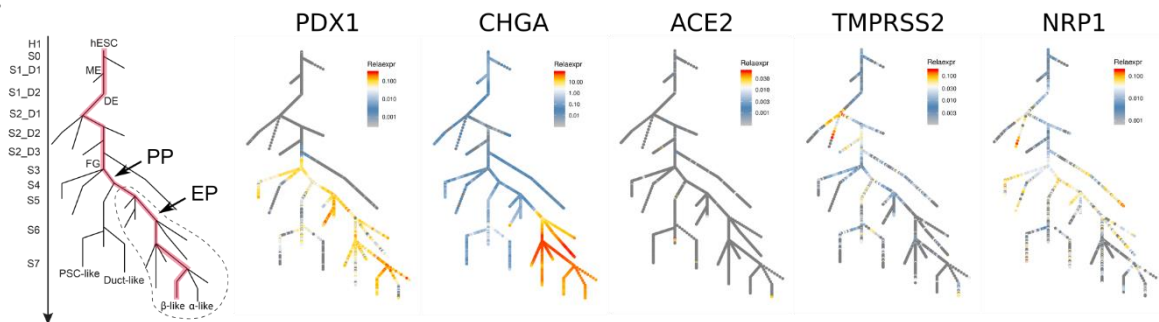

**Figure S2. Transcripts encoding SARS-CoV-2 receptors are expressed during *in vitro* differentiation of hPSC into pancreatic endocrine cells, Related to Figure 1.**

- a. The induction of different pancreatic progenitors during the hPSC *in vitro* differentiation. Top panel: pancreatic progenitors are marked by expression of PDX1 (in red), NKX2.2 (in green) and NKX6.1 (in green). Scale bar = 100  $\mu$ m. Bottom panel: endocrine progenitors are marked by expression of CHGA (in white) and ISL1-GFP (in green). Scale bar = 50  $\mu$ m. At the final stage of pancreatic differentiation,  $\beta$ -like cells express C-Peptide (shown in red) and ISL1-GFP (in green). DAPI marks nuclei in blue. Scale bar = 100  $\mu$ m.
- b. Single cell RNA-sequencing analysis of SARS-CoV-2 receptors (ACE2, TMPRSS2, NRP1) expression during 3D pancreatic differentiation of hPSCs (Sharon et al., 2019; extracted from: <https://ifx.rc.fas.harvard.edu/invitrobetacells/>)
- c. Single cell RNA-sequencing analysis of SARS-CoV-2 receptors (ACE2, TMPRSS2, NRP1) expression during 3D pancreatic differentiation of hPSCs (Weng et al., 2019; extracted from: <http://hiview.case.edu/public/BetaCellHub/differentiation.php>)

a.

SARS-CoV-2

Mock

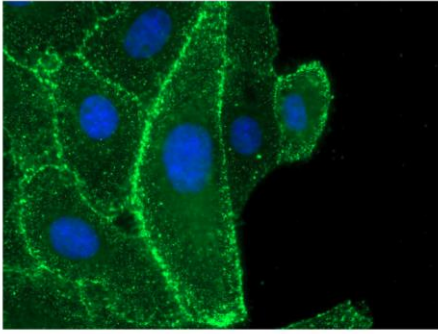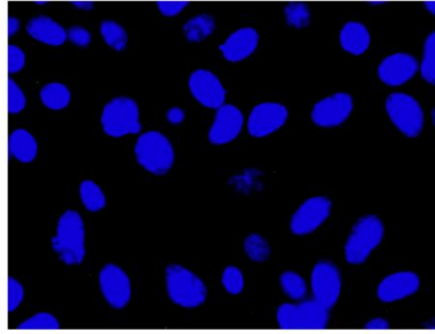

b.

SARS-CoV-2 Nc

CHGA

Merge/DAPI

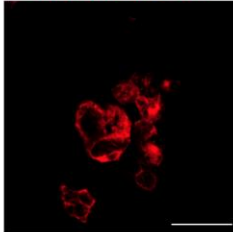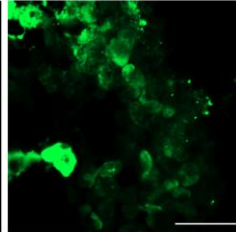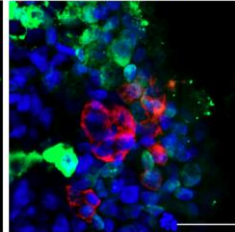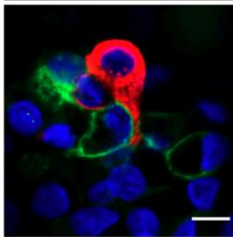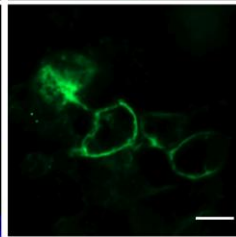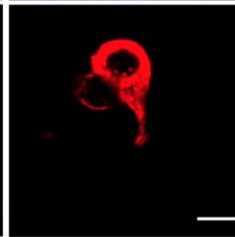

SARS-CoV-2 Nc

ISL1-GFP

Merge/DAPI

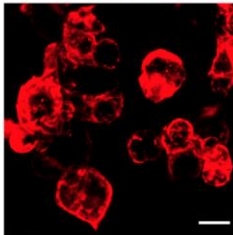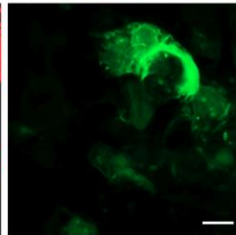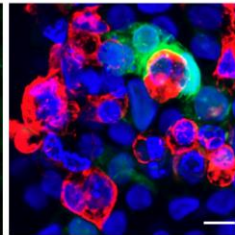

**Figure S3. SARS-CoV-2 infects pancreatic endocrine progenitors *in vitro*, Related to Table 1 and Figure 2.**

- a. Validation of anti SARS-Cov-2 Nucleocapsid antibody. Detection of SARS-CoV-2 infection in kidney epithelial cells from an African green monkey (Vero E6). Cells were infected with SARS-CoV-2 (TCID<sub>50</sub>=400/mL), or mock-infected, and fixed in 4% PFA at 48 hpi. SARS- CoV-2 Nc protein was detected with anti-Nc antibodies (1:1000 dilution), followed by secondary antibodies labeled with Alexa Fluor 488. SARS-CoV-2 Nc protein is presented in green, while the blue denotes cellular DNA. Nc = nucleocapsid protein
- b. Colocalization of lineage markers CHGA (green) and ISL1-GFP (green) with SARS-CoV-2 nucleocapsid (red) in hPSC-derived late EP spheroids infected with SARS-CoV-2. DAPI, in blue, marks nuclei. Scale bar = 25  $\mu$ m (top) or 10  $\mu$ m (middle and bottom).
